# Supplementary material for: Defining a Haplotype Encompassing the LCORL-NCAPG Locus Associated with Increased Lean Growth in Beef Cattle
Source: MDPI journal article supplement (doi:10.3390/genes15050576), 2024-04-30
Supplement: s1 [file s1]

## Supplementary Materials

|                                                                                                        |                  |
|--------------------------------------------------------------------------------------------------------|------------------|
| <b>Figure S1</b> - A 157-bp deletion within an intron of <i>NCAPG</i> .....                            | 2                |
| <b>Figure S2</b> - An insertion within the fifth intron of <i>NCAPG</i> .....                          | 2                |
| <b>Table S1</b> - Primers, enzymes, and expected fragment sizes for the PCR-RFLP genotyping assay..... | 3                |
| <b>Table S2</b> - Primers and probes for the 5'-3' exonuclease genotyping assay .....                  | 3                |
| <b>Table S3</b> - Full genotypes for all 34 animals between 37M and 38.2M on BTA6 .....                | Table_S3_S6.xlsx |
| <b>Table S4</b> - Short list summarizing variants in coding sequence or ATAC peaks ....                | Table_S3_S6.xlsx |
| <b>Table S5</b> - Full list summarizing all <i>Q</i> -exclusive variants .....                         | Table_S3_S6.xlsx |
| <b>Table S6</b> - Summary of FIMO score predictions .....                                              | Table_S3_S6.xlsx |

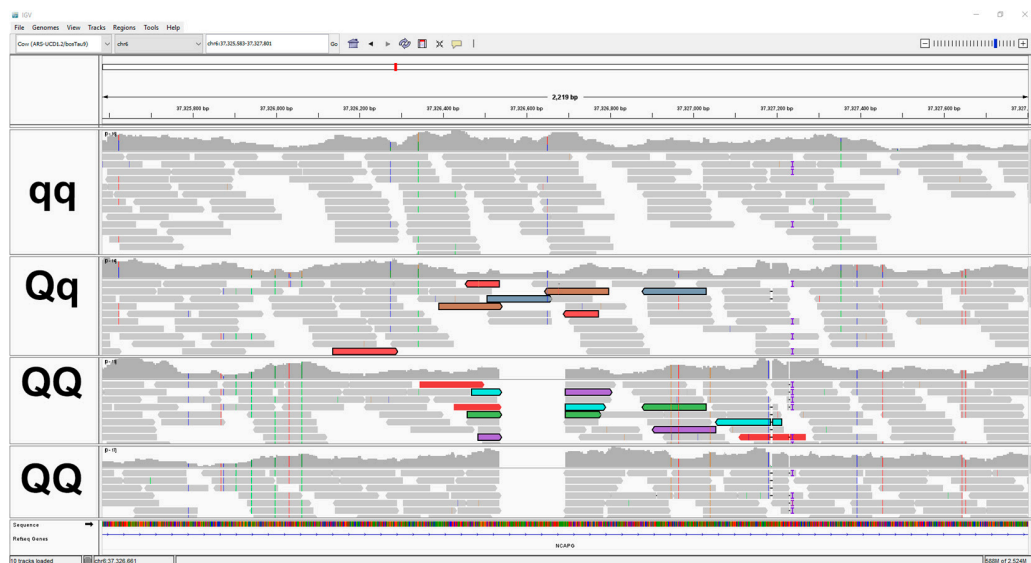

Figure S1. A 157-bp deletion within the first intron of *NCAPG*.

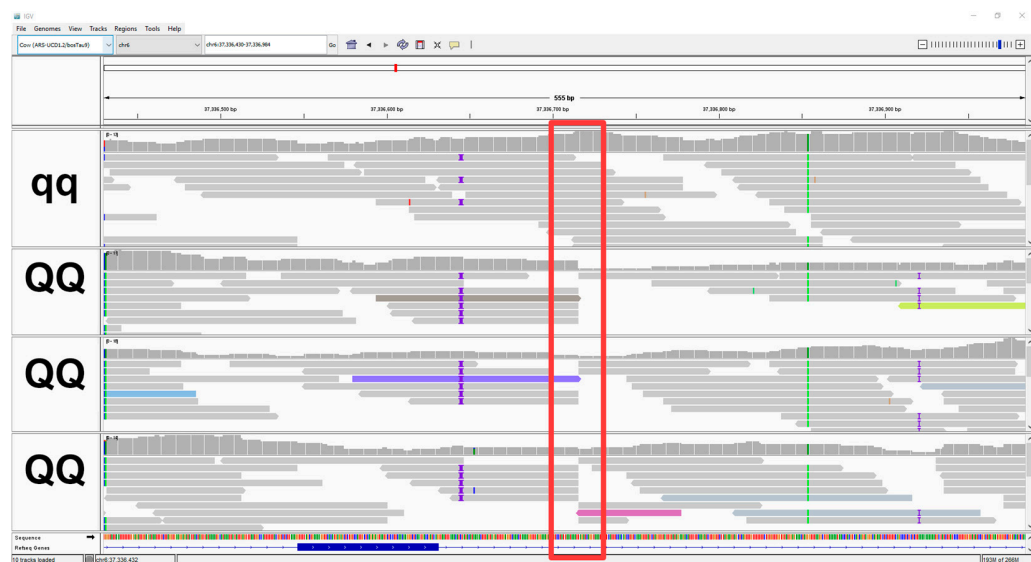

Figure S2. An insertion within the fifth intron of *NCAPG*.

**Table S1.** Primers, enzymes, and expected fragment sizes for the PCR-RFLP genotyping assay.

| Variant     | Primer Type | Primer Sequence                | Enzyme | Fragment Sizes    |
|-------------|-------------|--------------------------------|--------|-------------------|
| rs109696064 | Forward     | 5'-CAGGTGCTGTTCTGGACTGT-3'     | HpyAV  | C: 129, 152, 394  |
|             | Reverse     | 5'-GGTGAGTCAGGAGAGCTGTG-3'     |        | T: 281, 394       |
| rs384548488 | Forward     | 5'-CTGCAGTGTTTACAGATGATATGA-3' | Hinfl  | ACT: 75, 162, 344 |
|             | Reverse     | 5'-AGGCTTGTGATTTGGTCGAA-3'     |        | A: 75, 504        |

**Table S2.** Primers and probes for the 5'-3' exonuclease genotyping assay.

| Variant     | Primer Type | Primer Sequence                |
|-------------|-------------|--------------------------------|
| rs109696064 | Forward     | 5'-AGATCTCGAAGTCCCTCACC-3'     |
|             | Probe C     | 5'-6-FAM/AGGCTGAAGGA-3'iABkFQ  |
|             | Probe T     | 5'-SUN/CAGGCTAAAGGAT-3'iABkF   |
|             | Reverse     | 5'-GCTGAACACTCCGAGATGAC-3'     |
| rs384548488 | Forward     | 5'-GACCAAACAGACATTGCCAT-3'     |
|             | Probe ACT   | 5'-6-FAM/CCCAGAGTCTCT-3'iABkF  |
|             | Probe A     | 5'-SUN/GCCCAGTCTCTCA-3'iABkF   |
|             | Reverse     | 5'-TCTTGACCTTCCATAAATAACAGT-3' |
